# Supplementary material
Source: HighWire-hosted journal article supplement (https://cmaj.ca/highwire/filestream/59430/field_highwire_adjunct_files/0/185_17.pdf)
Supplement: 185_17.pdf [file 185_17.pdf]

## ÉDITORIAL

## Une journée par jour de sensibilisation aux maladies rejettera-t-elle dans l'ombre les maladies orphelines?

Diane Kelsall MD MEd

Pour la version anglaise de l'éditorial, veuillez consulter la page 1475.

**N**ovembre est un mois très occupé, et pas seulement parce que c'est le mois du jour du Souvenir, que Noël et d'autres fêtes hivernales arrivent à grands pas ou que c'est le temps des examens de mi-session pour bien des étudiants. C'est aussi parce que novembre a été transformé en une excuse pour les hommes de se faire pousser la moustache ou la barbe en signe d'appui aux programmes de santé masculine et que c'est le mois de la réanimation cardio-pulmonaire, du cancer du poumon, de l'ostéoporose, de la maladie de Crohn et la colite et de la maladie de Huntington. Novembre prête ses semaines à la sensibilisation à la douleur, à la sécurité des aînés, à la toxicomanie et à la prévention de l'empoisonnement par le plomb. C'est aussi le mois qui affiche une série de journées spéciales pour attirer l'attention de la communauté internationale sur la pneumonie, la maladie pulmonaire obstructive chronique et le diabète<sup>1,2</sup>. On consacre même 24 heures à célébrer l'invention de la toilette<sup>3</sup>!

Pourquoi y a-t-il tant de journées dédiées à la reconnaissance des maladies? Les objectifs varient, de la collecte de fonds à la promotion du dépistage, mais les organisateurs ont en commun le désir d'attirer l'attention sur ces maladies et leurs causes. Cette attention est particulièrement importante dans le cas des « maladies orphelines », ces maladies chroniques débilitantes ou graves et potentiellement mortelles qui touchent très peu de gens<sup>4</sup>.

Malheureusement, la pléthore de journées spéciales peut rejeter certaines maladies dans l'ombre, alors que d'autres suscitent l'intérêt de larges segments de la population (Jours de la jonquille et Movember viennent à l'esprit). La maladie qui retient l'attention peut simplement avoir bénéficié d'une bonne campagne de marketing ou de plus gros budgets ou être plus « séduisante ». Un mécanisme destiné à accroître la sensibilisation à des troubles essentiellement inconnus peut en fait avoir un effet contre-productif, reléguant encore une fois les maladies orphelines à l'orphelinat.

Les patients atteints de maladies rares et leurs familles se sentent souvent isolés quand ils cherchent à obtenir des ressources pour composer avec leurs maladies. Si l'on veut que les personnes touchées reçoivent de l'aide pour payer le coût élevé des traitements, il faut que les décideurs reconnaissent ces maladies. Sans cette reconnaissance par les bailleurs de fonds, il est peu probable que suffisamment de recherches soient consacrées aux causes, aux traitements et aux cures de ces maladies.

Même les revues spécialisées contribuent involontairement à l'isolement que ressentent ces patients et leurs familles du fait qu'elles choisissent de publier des articles sur les maladies qui sont plus courantes. Et pourtant, bien que certaines maladies soient véritablement rares<sup>5</sup>, le nombre important de maladies orphelines signifie que la plupart des médecins auront plusieurs patients atteints de tels troubles.

Est-il nécessaire pour les personnes qui s'intéressent à ces maladies d'avoir une journée ou une semaine spéciale ou un mois particulier pour tenter d'attirer l'attention, peut-être inutilement? Pas nécessairement. Mises à part les journées consacrées aux maladies, les maladies rares suscitent un intérêt croissant au Canada. Grâce à des projets de recherche en génomique, comme FORGE Canada (*Finding of Rare Disease Genes*), nous commençons à comprendre la base génétique de certaines de ces affections. Orphanet, un portail de référence international sur les maladies rares, est maintenant accessible au Canada, et une équipe nationale fournit des renseignements sur les cliniques spécialisées, les laboratoires, les organisations de recherche et les groupes de patients au pays. En outre, le gouvernement du Canada s'emploie à créer un nouveau cadre d'autorisation pour les médicaments particuliers, souvent coûteux, utilisés pour traiter des maladies orphelines. Ces initiatives et les efforts déployés par des groupes comme la Canadian Organization for Rare Disorders signifient que les patients, leurs familles et les fournisseurs de soins de santé auront maintenant un meilleur accès à l'information et aux ressources et que des programmes de recherche améliorés permettront de mieux comprendre ces troubles et de découvrir des pistes de prévention et de traitements curatifs pour l'avenir.

Nous sommes d'avis que les revues médicales pourraient participer à cette action. Nous cherchons des articles sur les affections négligées qui pourraient bénéficier d'une attention accrue. Nous aimerions braquer les projecteurs sur une ou deux de ces maladies dans les pages du *JAMC* au cours de l'année à venir. On entend par « négligée » une maladie à laquelle on accorde peu d'importance et qui est peu connue. Cela peut signifier que la maladie est rare, mais il n'est pas impératif qu'elle le soit. Par « bénéficier », on entend qu'il doit y avoir de bonnes chances de pouvoir faire quelque chose pour cette maladie, notamment par une meilleure utilisation des traitements ou des services existants ou par la poursuite d'un axe de recherche prometteur. Si vous connaissez une

maladie qui répond à ces critères, nous vous invitons à nous écrire à [cmajeditorial@cmaj.ca](mailto:cmajeditorial@cmaj.ca), en prenant soin d'inscrire « maladies négligées » dans la ligne objet de votre courriel.

Et peut-être qu'un jour, il ne sera plus nécessaire d'organiser autant de journées de sensibilisation aux maladies.

## Références

1. United Nations observances. New York (NY): United Nations. Disponible : [www.un.org/en/events/observances/days.shtml](http://www.un.org/en/events/observances/days.shtml) (accessed 2013 Oct. 9).
2. Calendar of health promotion days. Ottawa (ON): Health Canada; 2013. Disponible : [www.hc-sc.gc.ca/ahc-asc/calend/index-eng.php](http://www.hc-sc.gc.ca/ahc-asc/calend/index-eng.php) (accessed 2013 Oct. 9).
3. Cassels A. A new national holiday? My vote's for World Toilet Day. *CMAJ* 2010;182:216.
4. *Canada's orphan drug policy: learning from the best*. Toronto (ON): Canadian Organization for Rare Disorders; 2005. Disponible : [www.raredisorders.ca/documents/CanadaOrphanDPFinal.pdf](http://www.raredisorders.ca/documents/CanadaOrphanDPFinal.pdf) (accessed 2013 Oct. 9).

5. Orphanet. Prevalence of rare diseases: bibliographic data. *Orphanet Report Series* June 2013; no. 1. Disponible : [www.orpha.net/orphacom/cahiers/docs/GB/Prevalence\\_of\\_rare\\_diseases\\_by\\_alphabetical\\_list.pdf](http://www.orpha.net/orphacom/cahiers/docs/GB/Prevalence_of_rare_diseases_by_alphabetical_list.pdf) (accessed 2013 Oct. 9).

**Intérêts concurrents :** Se rendre à [www.cmaj.ca/site/misc/cmaj\\_staff.xhtml](http://www.cmaj.ca/site/misc/cmaj_staff.xhtml) pour les déclarations de l'équipe consultative de rédaction.

**Affiliations :** Diane Kelsall est rédactrice adjointe du *JAMC*

**Correspondance à :** Éditeur du *JAMC*, [pubs@cmaj.ca](mailto:pubs@cmaj.ca)

FORGE ([www.genomebc.ca/portfolio/projects/health-projects/finding-of-rare-disease-genes-in-canada-forge-canada/](http://www.genomebc.ca/portfolio/projects/health-projects/finding-of-rare-disease-genes-in-canada-forge-canada/))  
Orphanet ([www.orpha.net](http://www.orpha.net))  
Canadian Organization for Rare Disorders ([www.raredisorders.ca](http://www.raredisorders.ca))

## RÉSUMÉS DE RECHERCHE

# Effets de suppléments de fer quotidiens chez les enfants du primaire : revue systématique et méta-analyse des essais randomisés et contrôlés

Michael Low MBBS BMedSci, Ann Farrell MBBS, Beverley-Ann Biggs PhD, Sant-Rayn Pasricha PhD

Pour la version anglaise de ce résumé, veuillez consulter la page 1487.

Voir le commentaire connexe en anglais de Gray-Donald à la page 1477 et à [www.cmaj.ca/lookup/doi/10.1503/cmaj.131249](http://www.cmaj.ca/lookup/doi/10.1503/cmaj.131249)

### Intérêts concurrents :

Michael Low a reçu des allocations de voyage de Gilead Sciences. Sant-Rayn Pasricha est co-investigateur d'une étude bénéficiant d'une subvention de recherche versée sans restriction par Vifor Pharma. Aucun intérêt concurrent déclaré par Ann Farrell et Beverley-Ann Biggs.

Cet article a été revu par les pairs.

### Correspondance à :

Sant-Rayn Pasricha,  
[sant-rayn.pasricha@unimelb.edu.au](mailto:sant-rayn.pasricha@unimelb.edu.au)

**Contexte :** L'anémie est un problème important en santé publique et au plan clinique. Des études d'observation ont établi un lien entre la carence en fer et l'anémie chez les enfants qui éprouvent différents types de problèmes, notamment en ce qui concerne le développement cognitif. Toutefois, l'administration de suppléments de fer, une stratégie préventive et thérapeutique d'usage courant, est associée à des effets indésirables. Les enfants du primaire sont à une étape cruciale de leur développement intellectuel et l'optimisation de leur rendement cognitif pourrait comporter des avantages durables tant, pour les individus que pour la société. Dans la présente étude, nous résumons les preuves concernant les bienfaits et l'innocuité d'un supplément de fer quotidien chez les enfants du primaire.

**Méthodes :** Nous avons interrogé des bases de données électroniques (y compris MEDLINE et Embase) et d'autres sources (en date de juillet 2013) pour recenser les essais contrôlés randomisés et quasi-randomisés ayant porté sur l'administration quotidienne de suppléments de fer chez les enfants de 5 à 12 ans. Nous avons combiné les données à l'aide d'une méta-analyse selon un modèle à effet aléatoire.

**Résultats :** Nous avons recensé 16 501 études; parmi ces études, nous avons analysé 76 articles en texte intégral et inclus 32 études regroupant 7089 enfants. Parmi les études incluses, 31 ont été réalisées dans des milieux à revenu faible ou moyen. Les suppléments de fer ont amélioré : les scores cognitifs globaux (différence moyenne standardisée 0,50; intervalle de confiance [IC] de 95 % 0,11 à 0,90,  $p = 0,01$ ), le quotient intellectuel chez les enfants anémiques (différence moyenne 4,55; IC de 95 % 0,16 à 8,94,  $p = 0,04$ ), de même que l'attention et la concentration. Les suppléments de fer ont aussi amélioré la taille ajustée par rapport à l'âge chez tous les enfants et le poids ajusté par rapport à l'âge chez les enfants anémiques. Les suppléments de fer ont réduit de 50 % le risque d'anémie et de 79 % le risque de carence en fer. L'observance thérapeutique a généralement été élevée dans le contexte des essais cliniques. Les données sur l'innocuité ont été limitées.

**Interprétation :** Selon notre analyse, l'administration de suppléments de fer améliore de manière sécuritaire les résultats hématologiques et non hématologiques chez les enfants du primaire de milieux à revenu faible ou moyen et elle est bien tolérée.
